# Supplementary material
Source: PubMed Central journal article supplement (PMC4787910)
Supplement: rota622704.wf1_default.pdf [file rota622704.wf1_default.pdf]

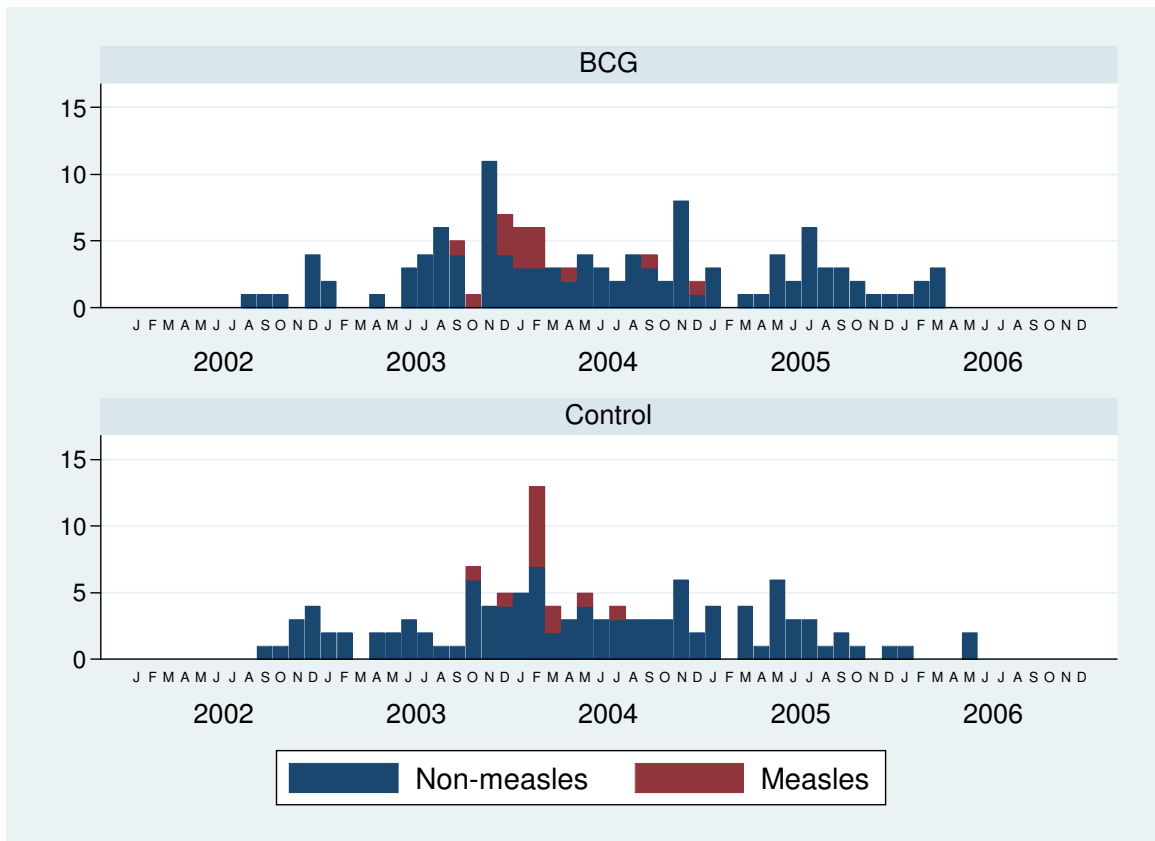

**The number of first admissions by month in the BCG revaccinated and the control group from July 2002 to May 2006 [posted as supplied by author]**
